# Supplementary material for: Validity and Reliability of the Portuguese-Performance Assessment of Self-Care Skills (P-Pass) for Individuals with Disabilities
Source: Research Square preprint supplement (doi:10.21203/rs.3.rs-60570/v3), 2020-12-17
Supplement: Supplementary file 1 [file f9deaabcb593a22243515b27.docx]

Results from confirmatory factor analysis on independence construct:


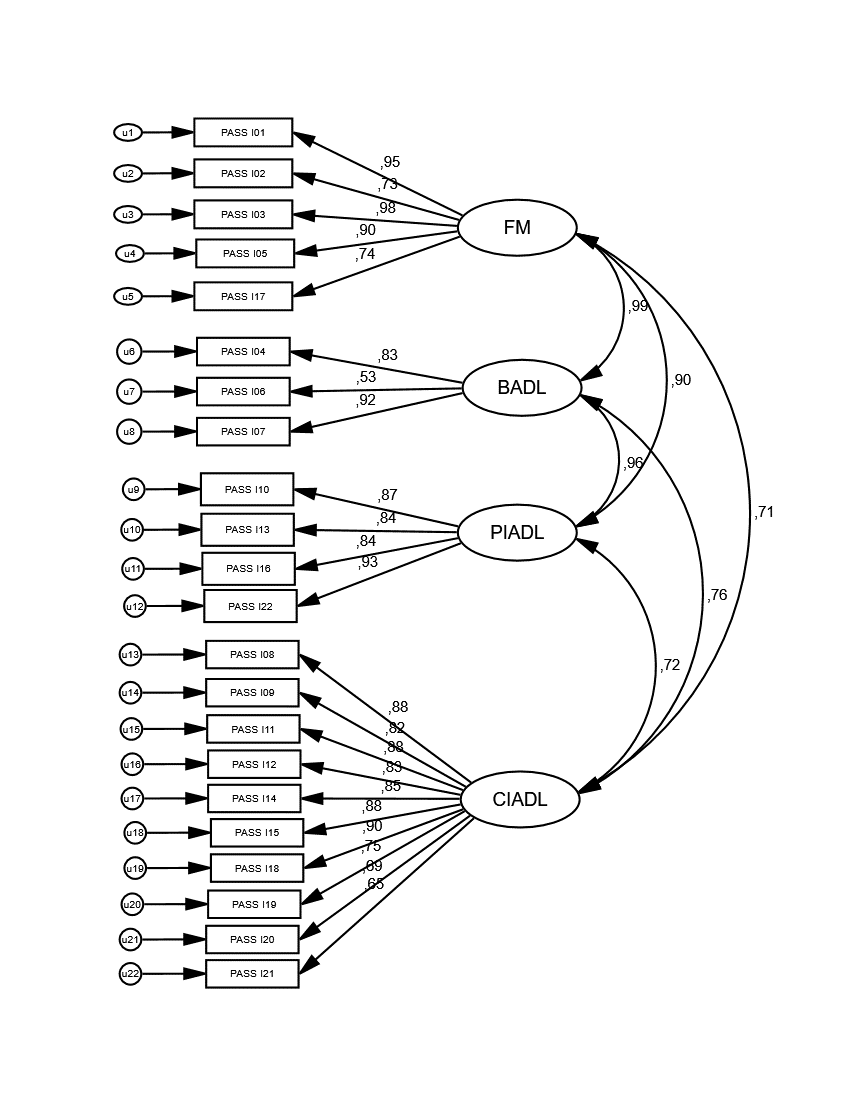


Summary Statistics

| **2** | **TLI** | **CFI** | **RMSEA** |
| --- | --- | --- | --- |
| p<0.001 | p=0.801 | p=0.825 | p=0.151 |

2: Model Chi-Square; TLI: TuckerLewis Index; CFI: Comparative Fit Index; RMSEA: Root Mean Square Error

Results from confirmatory factor analysis on safety construct:


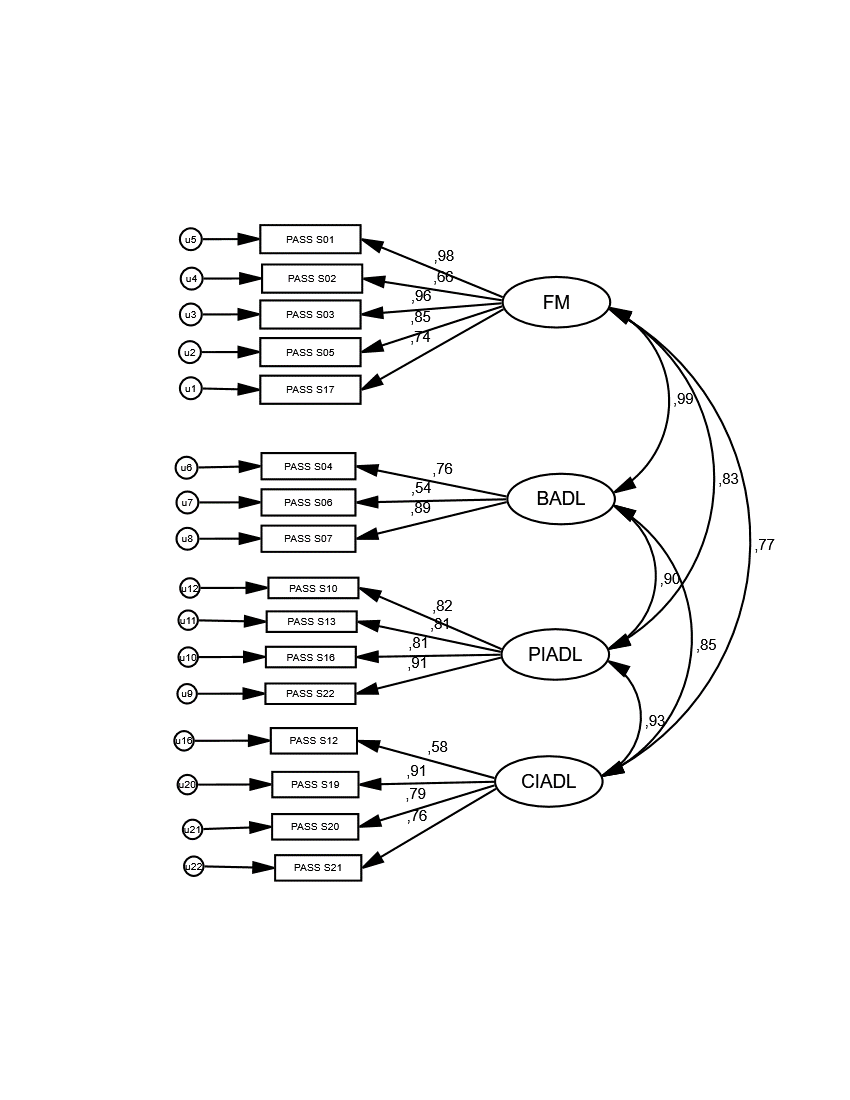


Summary Statistics

| **2** | **TLI** | **CFI** | **RMSEA** |
| --- | --- | --- | --- |
| p<0.001 | p=0.866 | p=0.890 | p=0.133 |

2: Model Chi-Square; TLI: TuckerLewis Index; CFI: Comparative Fit Index; RMSEA: Root Mean Square Error

Results from confirmatory factor analysis on adequacy construct:


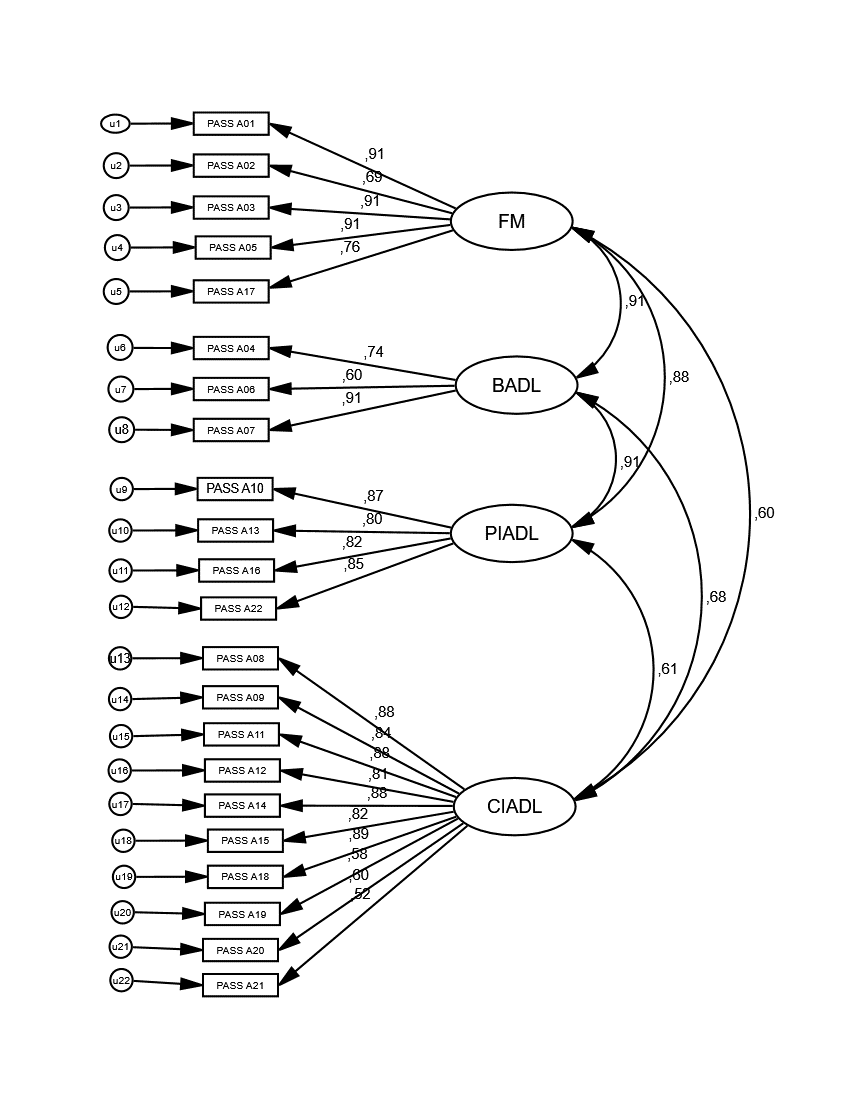


Summary Statistics

| **2** | **TLI** | **CFI** | **RMSEA** |
| --- | --- | --- | --- |
| p<0.001 | p=0.787 | p=0.813 | p=0.142 |

2: Model Chi-Square; TLI: TuckerLewis Index; CFI: Comparative Fit Index; RMSEA: Root Mean Square Error
